# Supplementary material for: Public health in genetic spaces: a statistical framework to optimize cluster-based outbreak detection
Source: PubMed Central journal article supplement (PMC7069216; doi:10.1093/ve/veaa011), 2020-03-13

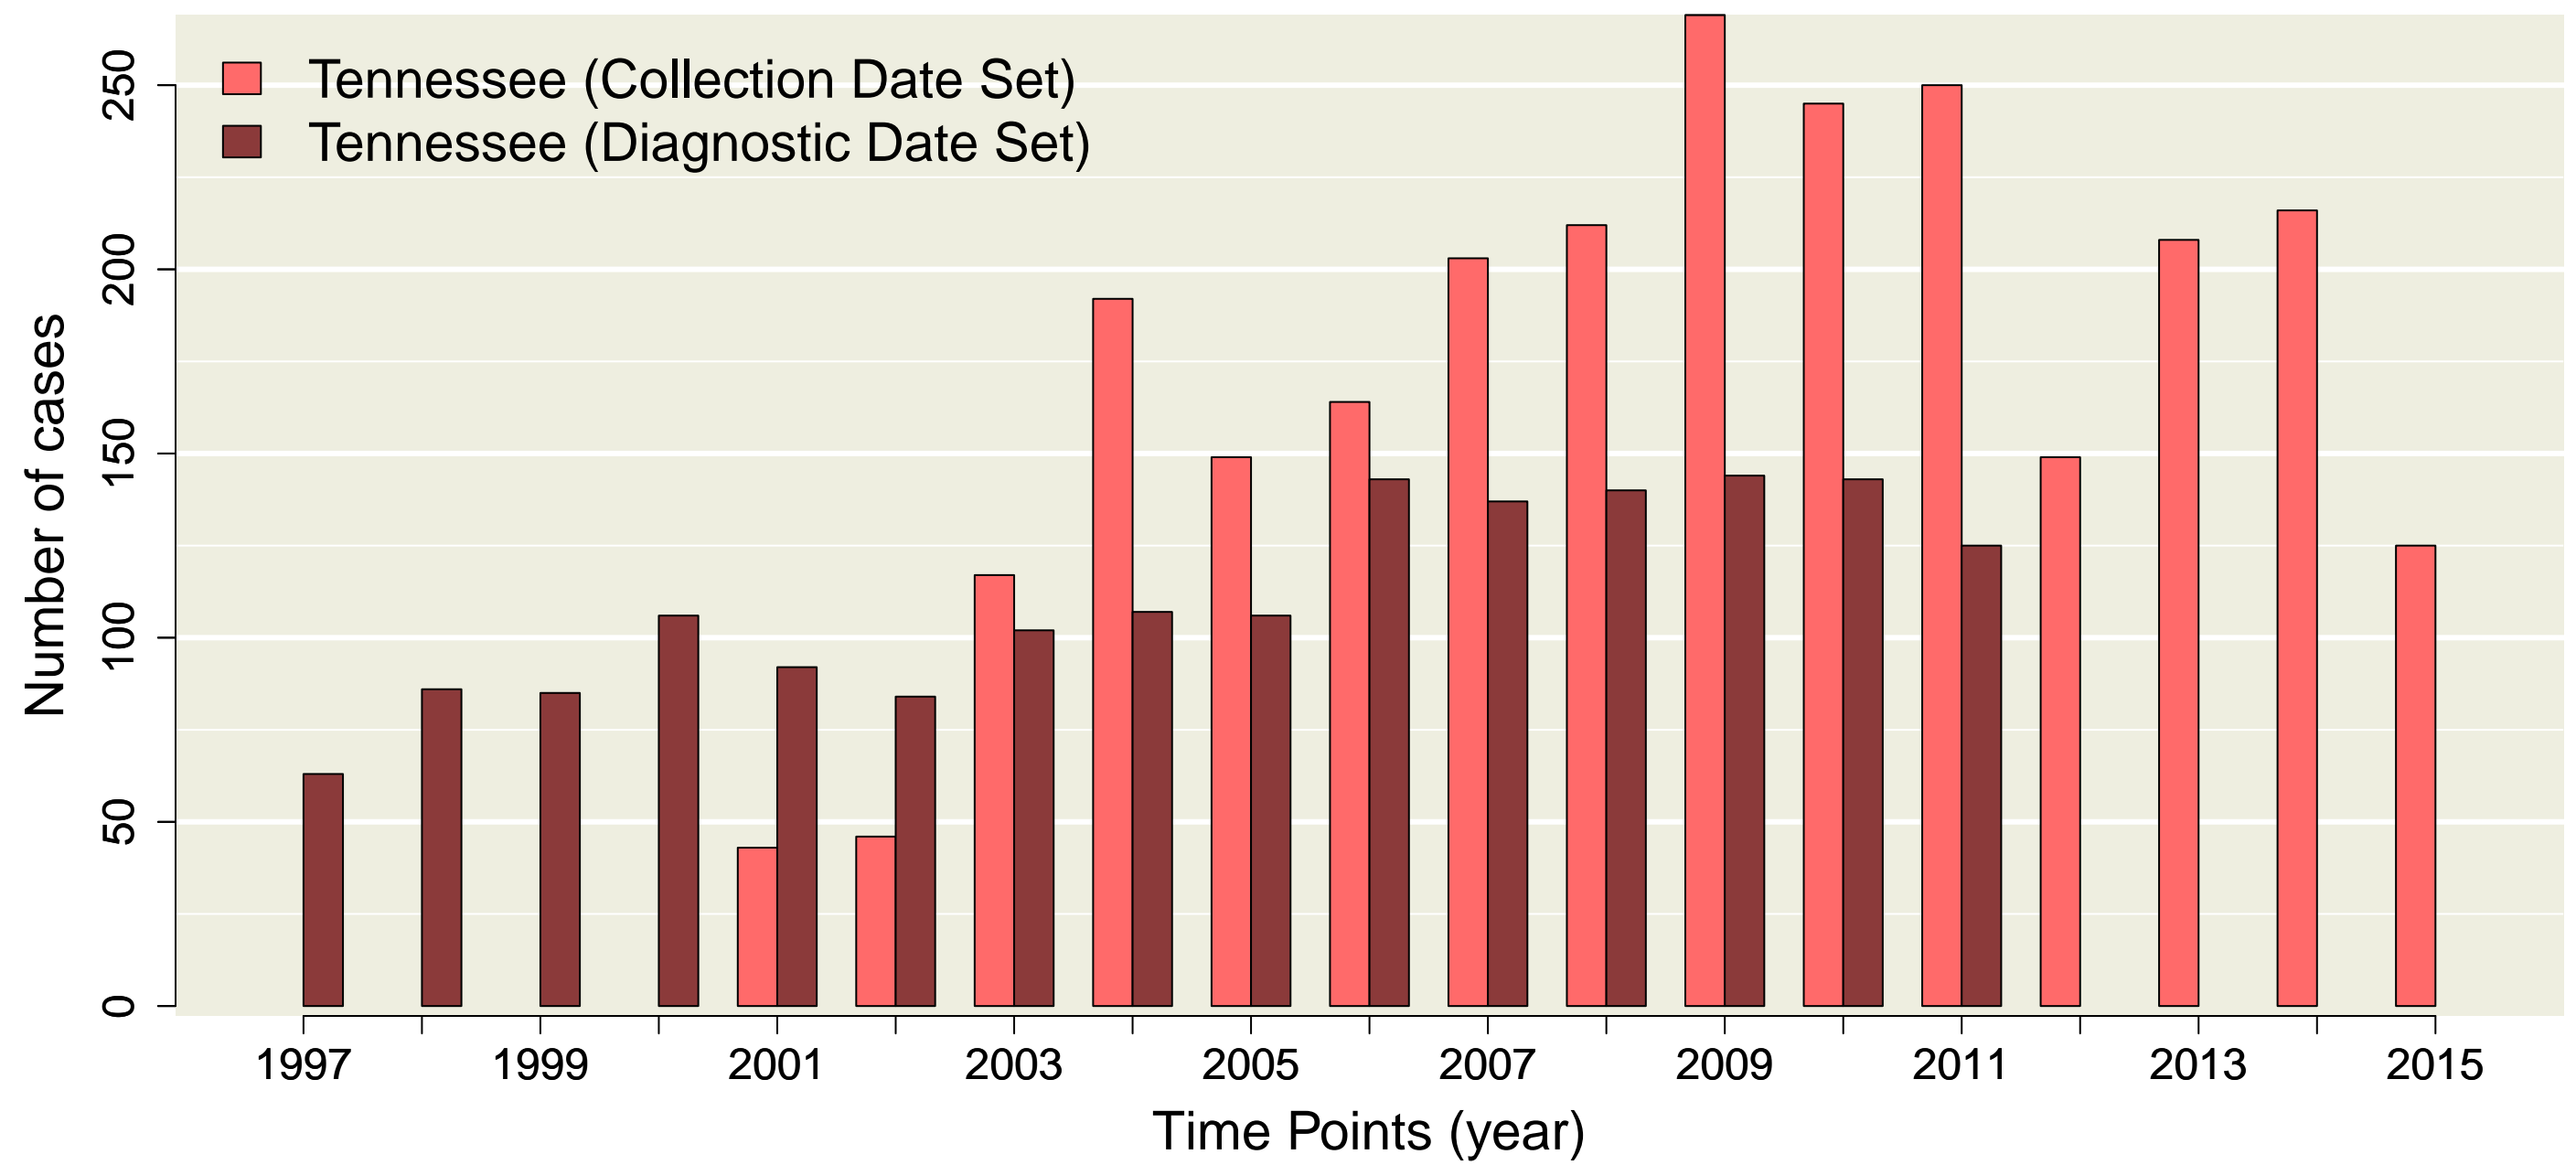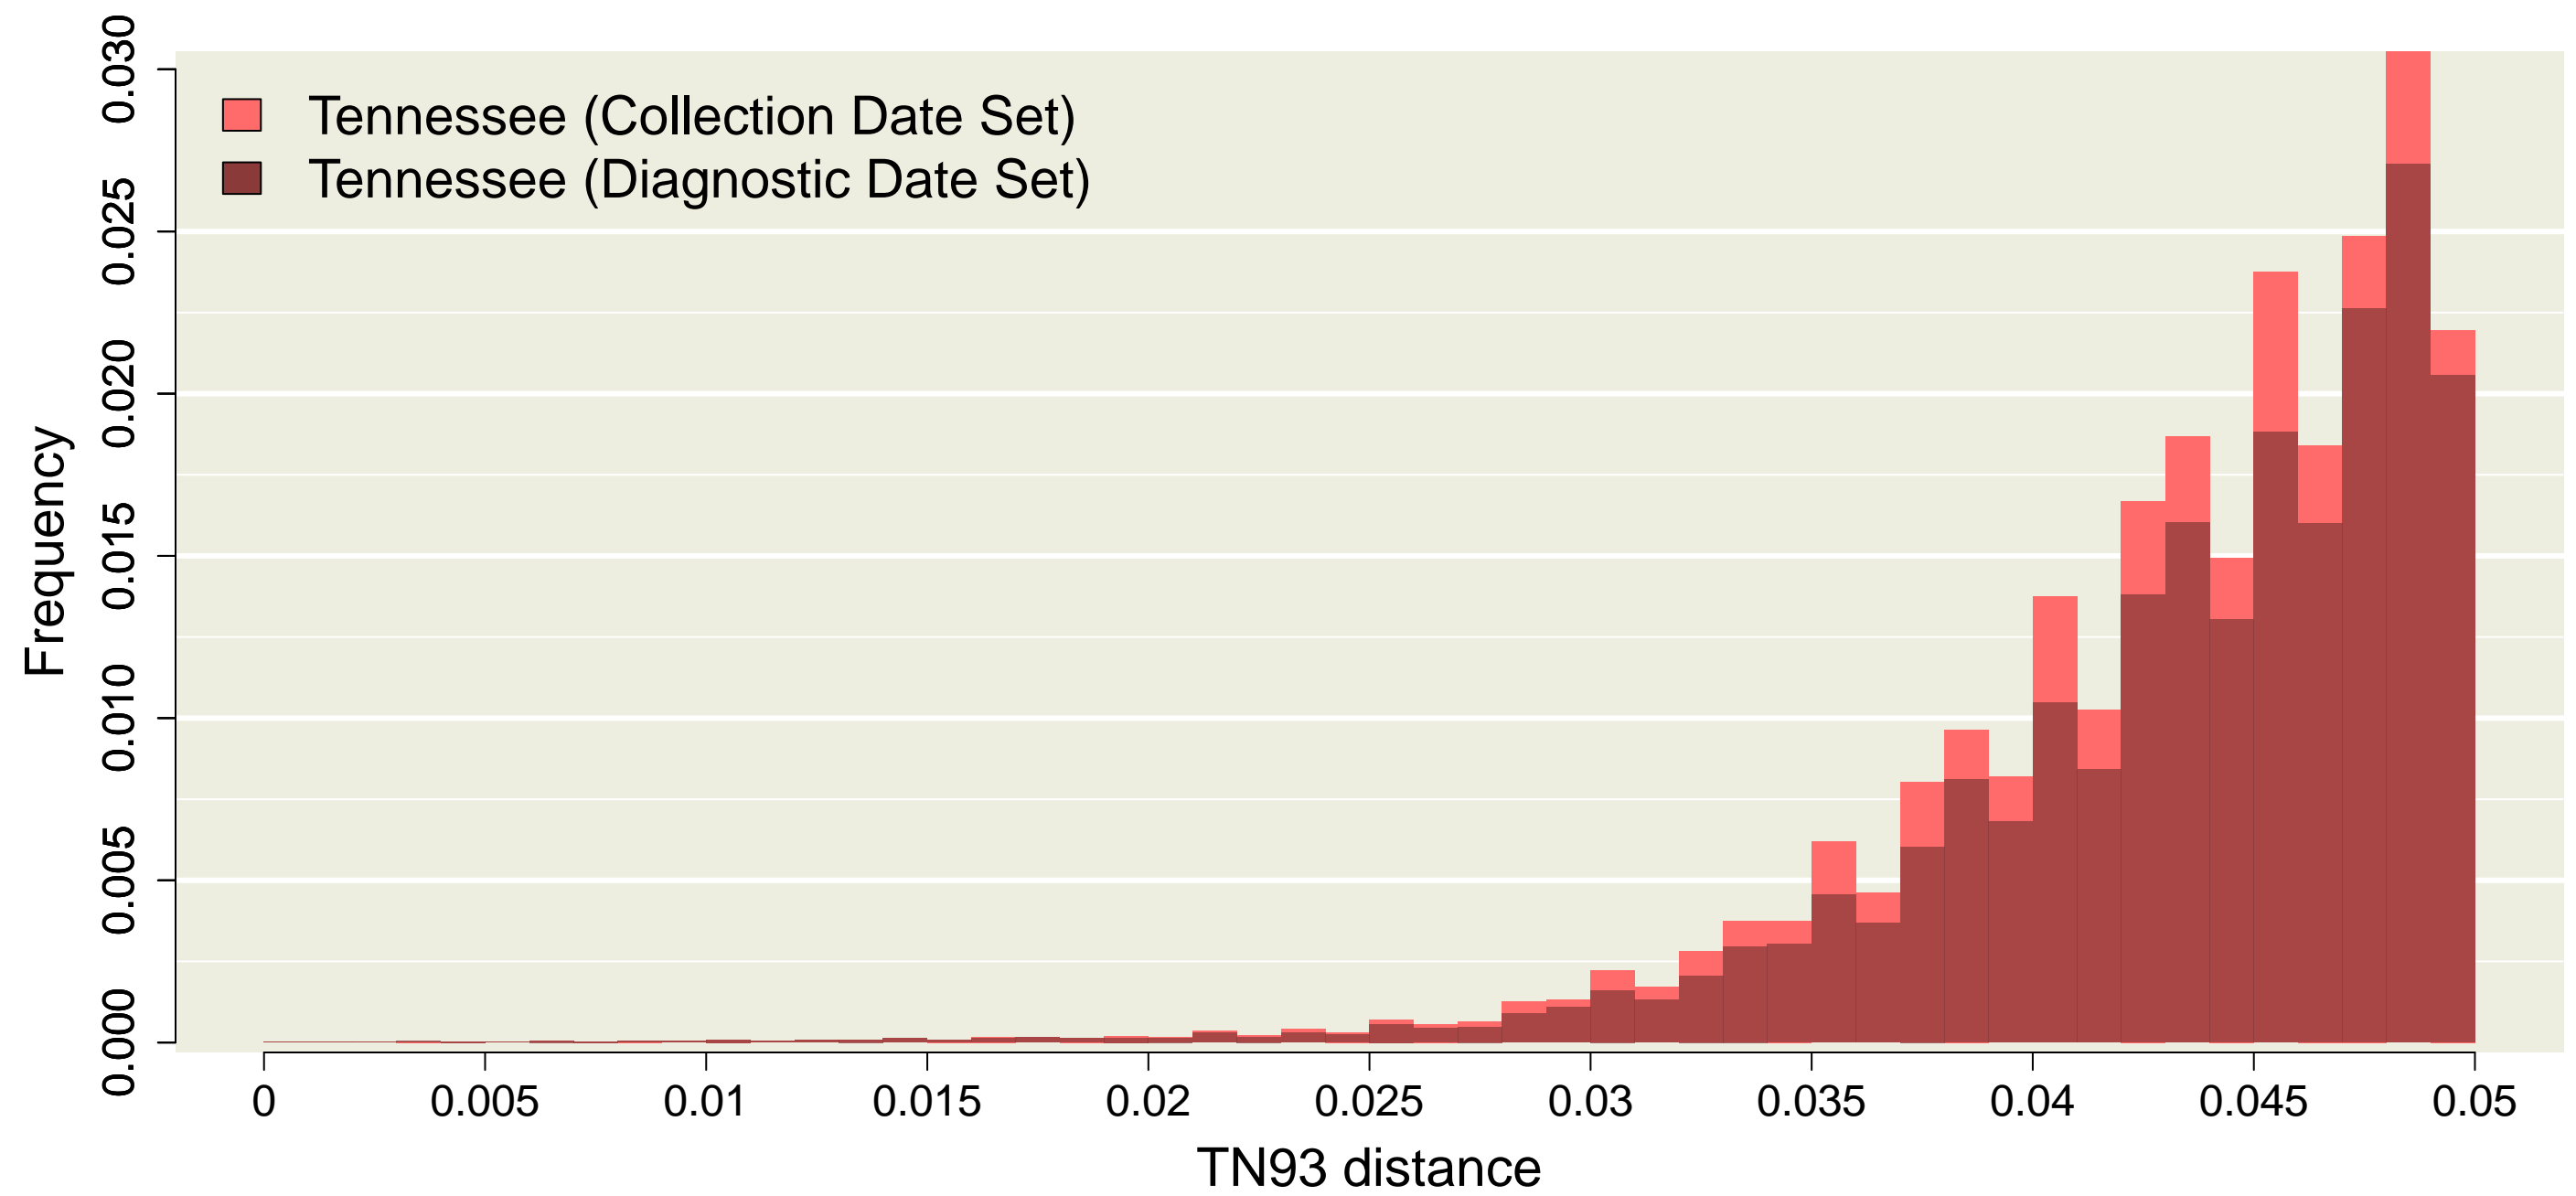

Supplement: veaa011_supplementary_data.pdf [file veaa011_supplementary_data.pdf]
